# Supplementary material for: A comparison of diet versus diet + exercise programs for health improvement in middle-aged overweight women
Source: PubMed Central journal article supplement — Womens Health (Lond). 2020 Jun 28;16:1745506520932372. doi: 10.1177/1745506520932372 (PMC7325539; doi:10.1177/1745506520932372), 2020-06-28
Supplement: appendix.pdf [file appendix.pdf]

APPENDIX 1: Individual data of weight change of all women by groups

|    | <b>Exer+nutr<br/>group weight<br/>change</b> | <b>Nutrition<br/>group weight<br/>change</b> | <b>Exercise group<br/>weight change</b> | <b>Control group<br/>weigh change</b> |
|----|----------------------------------------------|----------------------------------------------|-----------------------------------------|---------------------------------------|
| 1  | -1.5                                         | -4.8                                         | 0.1                                     | 0                                     |
| 2  | -4.9                                         | -3.3                                         | -0.2                                    | -10.8                                 |
| 3  | -1.8                                         | -4.9                                         | -4.3                                    | 2.8                                   |
| 4  | -3.1                                         | -7.1                                         | -1.5                                    | 4.6                                   |
| 5  | -3.1                                         | -4.6                                         | -1.7                                    | 0.1                                   |
| 6  | -3.2                                         | 0.2                                          | -0.5                                    | 1.9                                   |
| 7  | -6.1                                         | -7.4                                         | 2.3                                     | -2.3                                  |
| 8  | -1.3                                         | -1.5                                         |                                         | -1                                    |
| 9  | -5.2                                         | -4.4                                         |                                         | -0.5                                  |
| 10 | -2.4                                         | -2.3                                         |                                         | 0.6                                   |
| 11 | -7.4                                         | -6.3                                         |                                         | 0.5                                   |
| 12 | -4.9                                         | -3                                           |                                         | -2.2                                  |
| 13 | -3.2                                         | -6                                           |                                         | 1.3                                   |
| 14 | -7.3                                         | -1.9                                         |                                         | -1.3                                  |
| 15 | -3.7                                         | -2.9                                         |                                         | 2.7                                   |
| 16 | -0.9                                         | -4.7                                         |                                         | 1.6                                   |
| 17 | -2.8                                         | -9.9                                         |                                         | 1.8                                   |
| 18 | -2.8                                         | -4.7                                         |                                         | 0.3                                   |
| 19 | -4.2                                         | -1.3                                         |                                         | 1                                     |
| 20 | -8.3                                         | -1.5                                         |                                         | 4.2                                   |
| 21 | -3                                           | -0.6                                         |                                         | 0.6                                   |

|    |      |  |  |      |
|----|------|--|--|------|
| 22 | -4.4 |  |  | 0.3  |
| 23 | 0    |  |  | -0.1 |
| 24 | -0.6 |  |  | -5.7 |
| 25 | -6.4 |  |  | -1   |
| 26 | -2.6 |  |  | -0.9 |
| 27 | -3.4 |  |  | 0.3  |
| 28 | -9.5 |  |  |      |
| 29 | -6.3 |  |  |      |
| 30 | -3.8 |  |  |      |
| 31 | -4.8 |  |  |      |
| 32 | -0.5 |  |  |      |
| 33 | -5.5 |  |  |      |
| 34 | -4.3 |  |  |      |
| 35 | -3.9 |  |  |      |
| 36 | -3.3 |  |  |      |
| 37 | -2.5 |  |  |      |
| 38 | -1.5 |  |  |      |
| 39 | -1.3 |  |  |      |
| 40 | -1.3 |  |  |      |
| 41 | 3.7  |  |  |      |
